# Supplementary material
Source: PubMed Central journal article supplement (PMC7725230)

**Figure E1.1 Pooled estimate of asthma comorbidity rate in COVID-19 patients in East Asia and the Pacific**

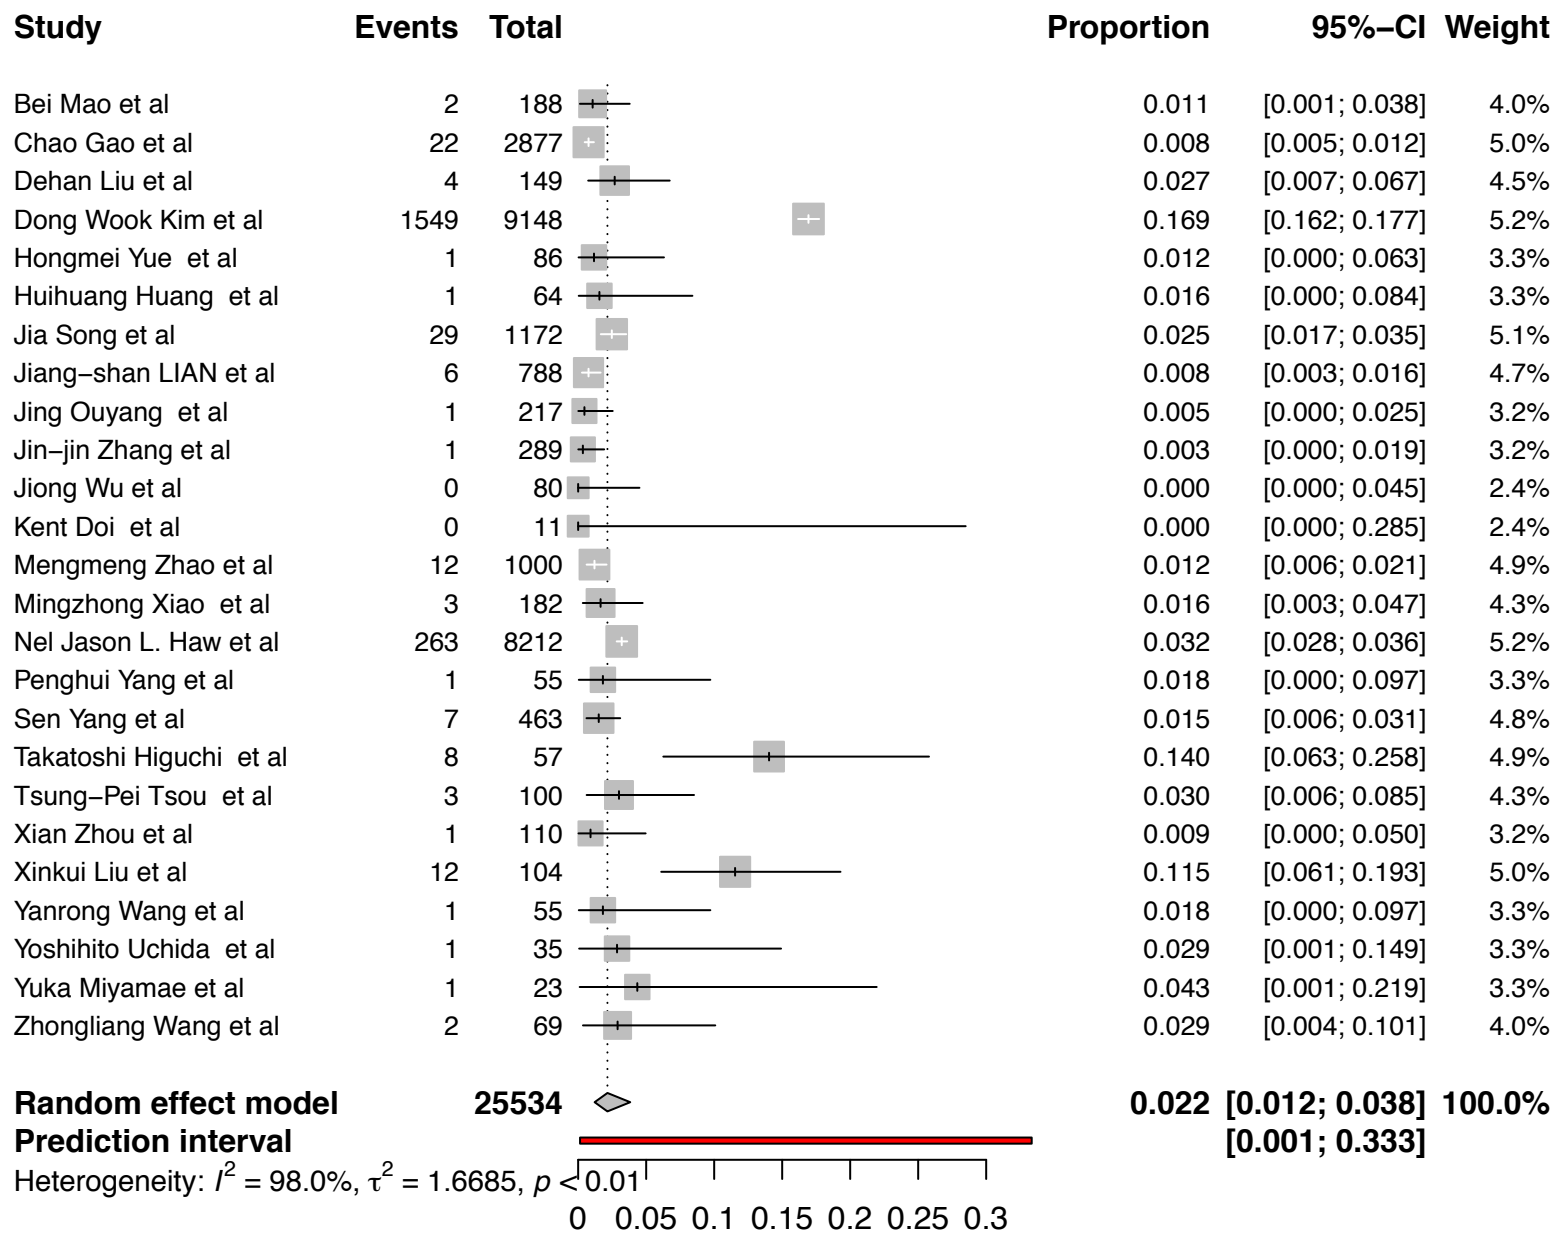

**Figure E1.2 Pooled estimate of asthma comorbidity rate in COVID-19 patients in Europe**

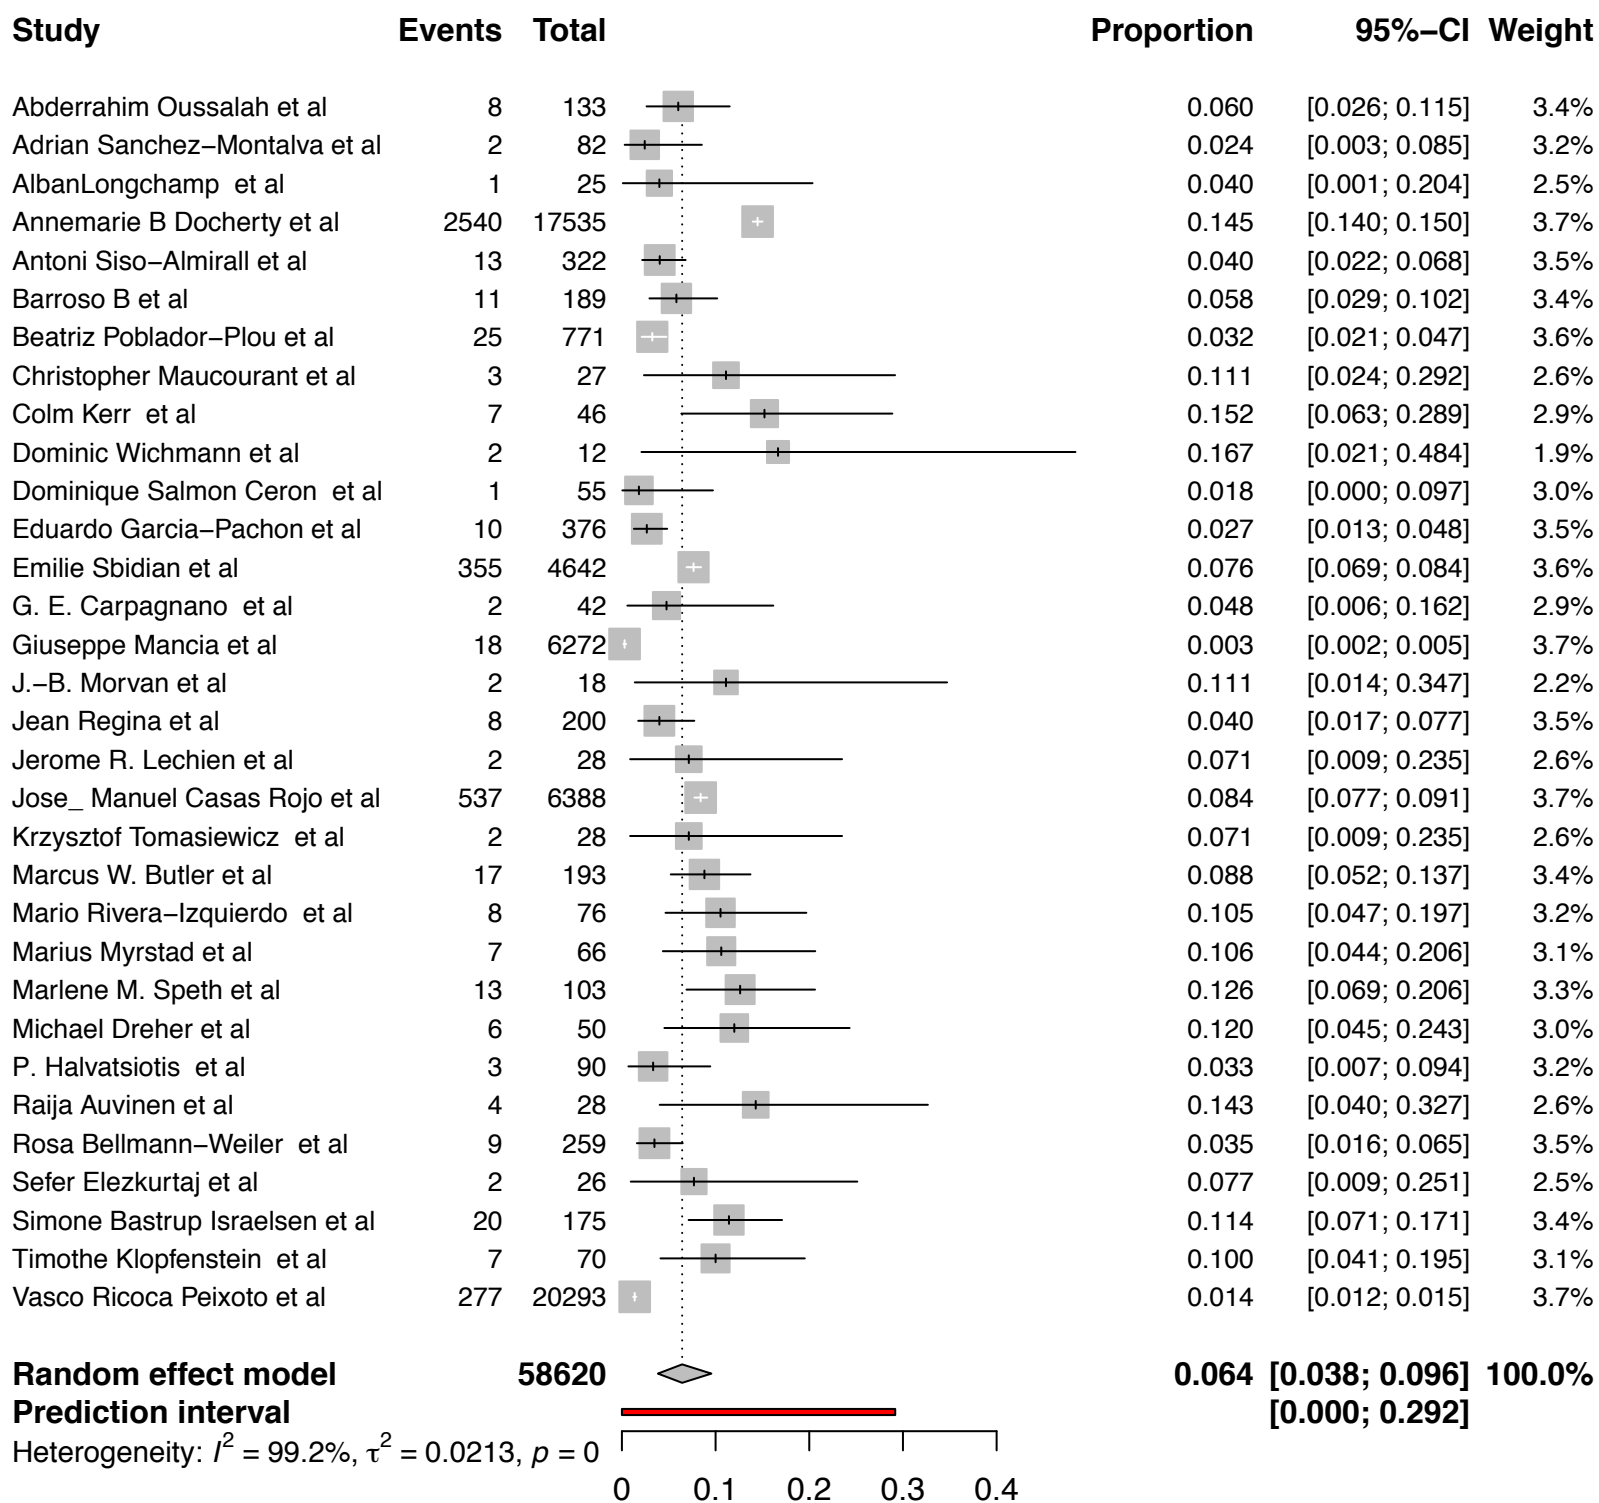

Figure E1.3 Pooled estimate of asthma comorbidity rate in COVID-19 patients in Latin America and Caribbe

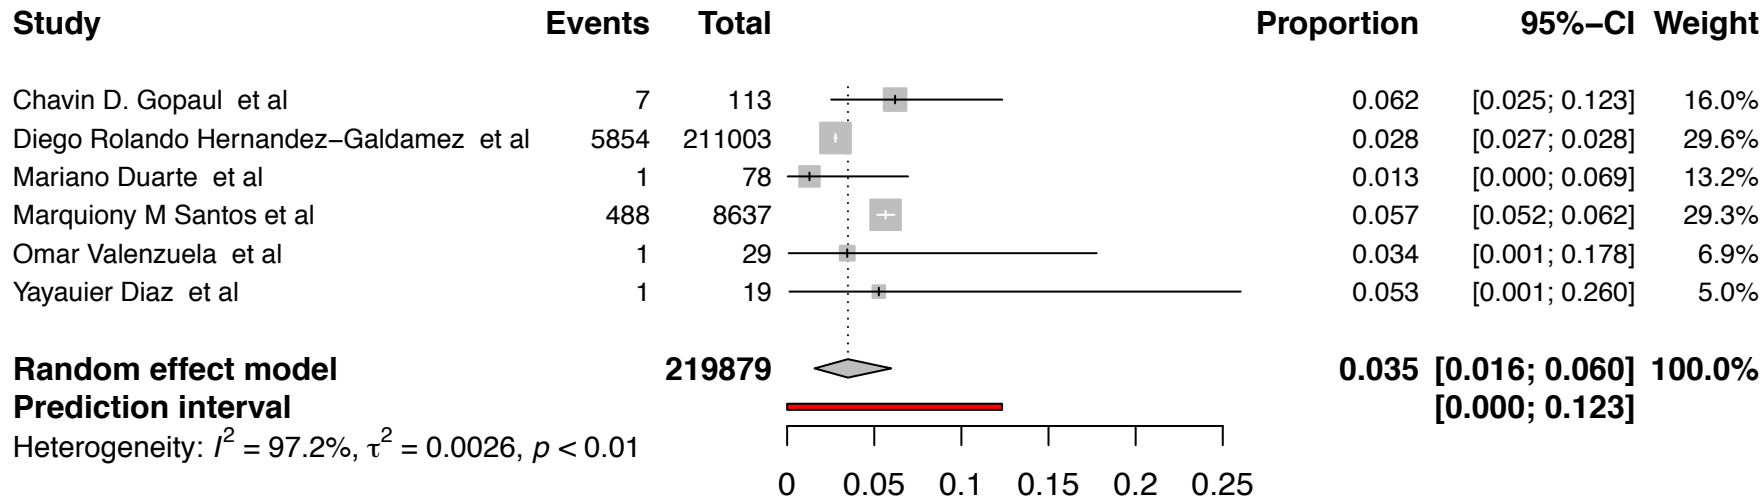

**Figure E1.4 Pooled estimate of asthma comorbidity rate in COVID-19 patients in Middle East and North Africa**

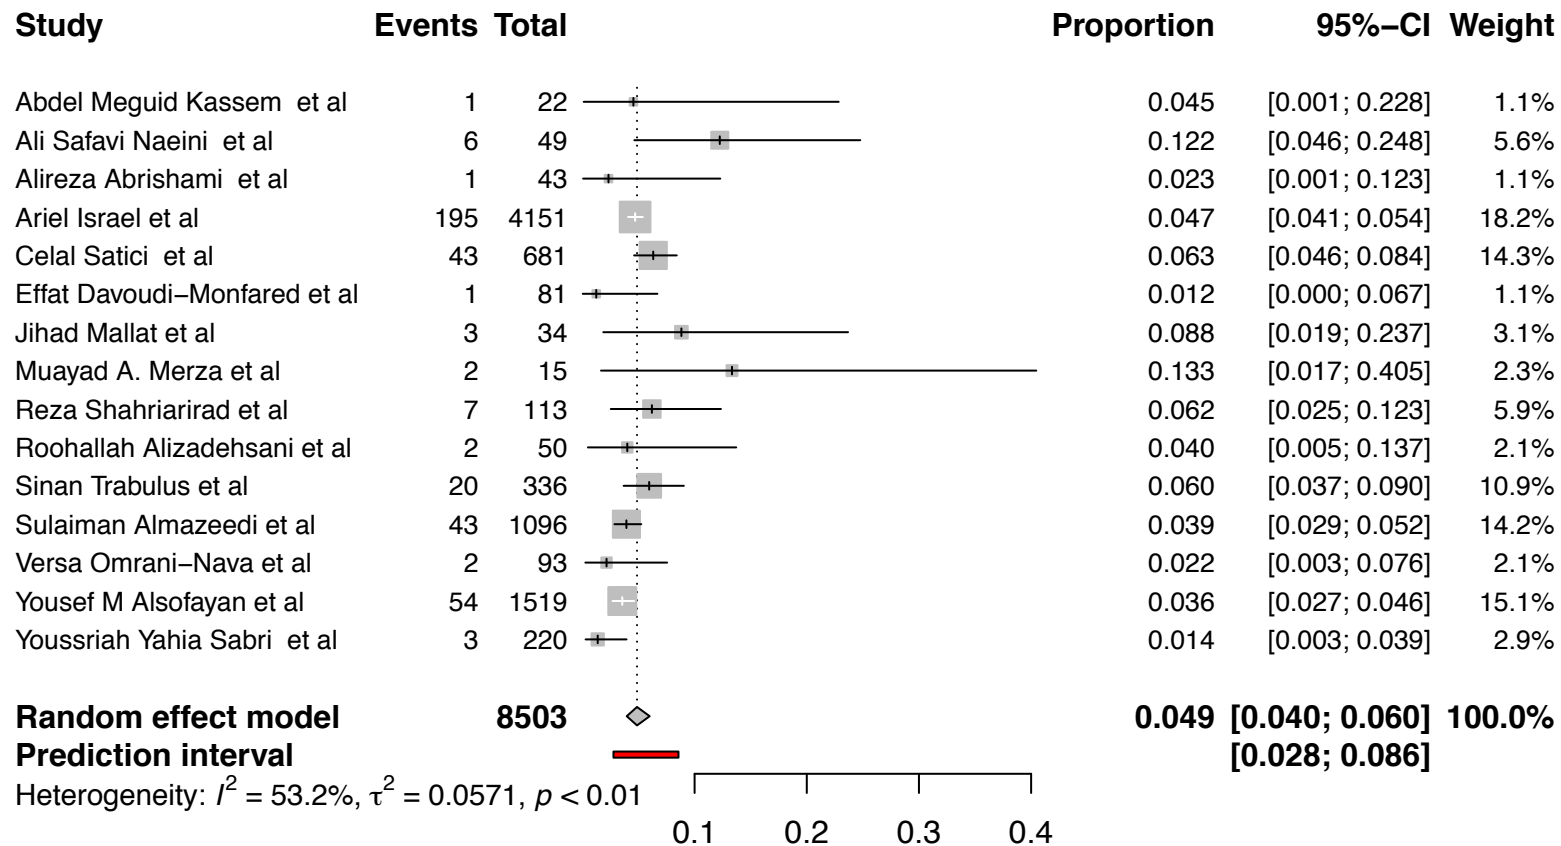

**Figure E1.5 Pooled estimate of asthma comorbidity rate in COVID-19 patients in North America**

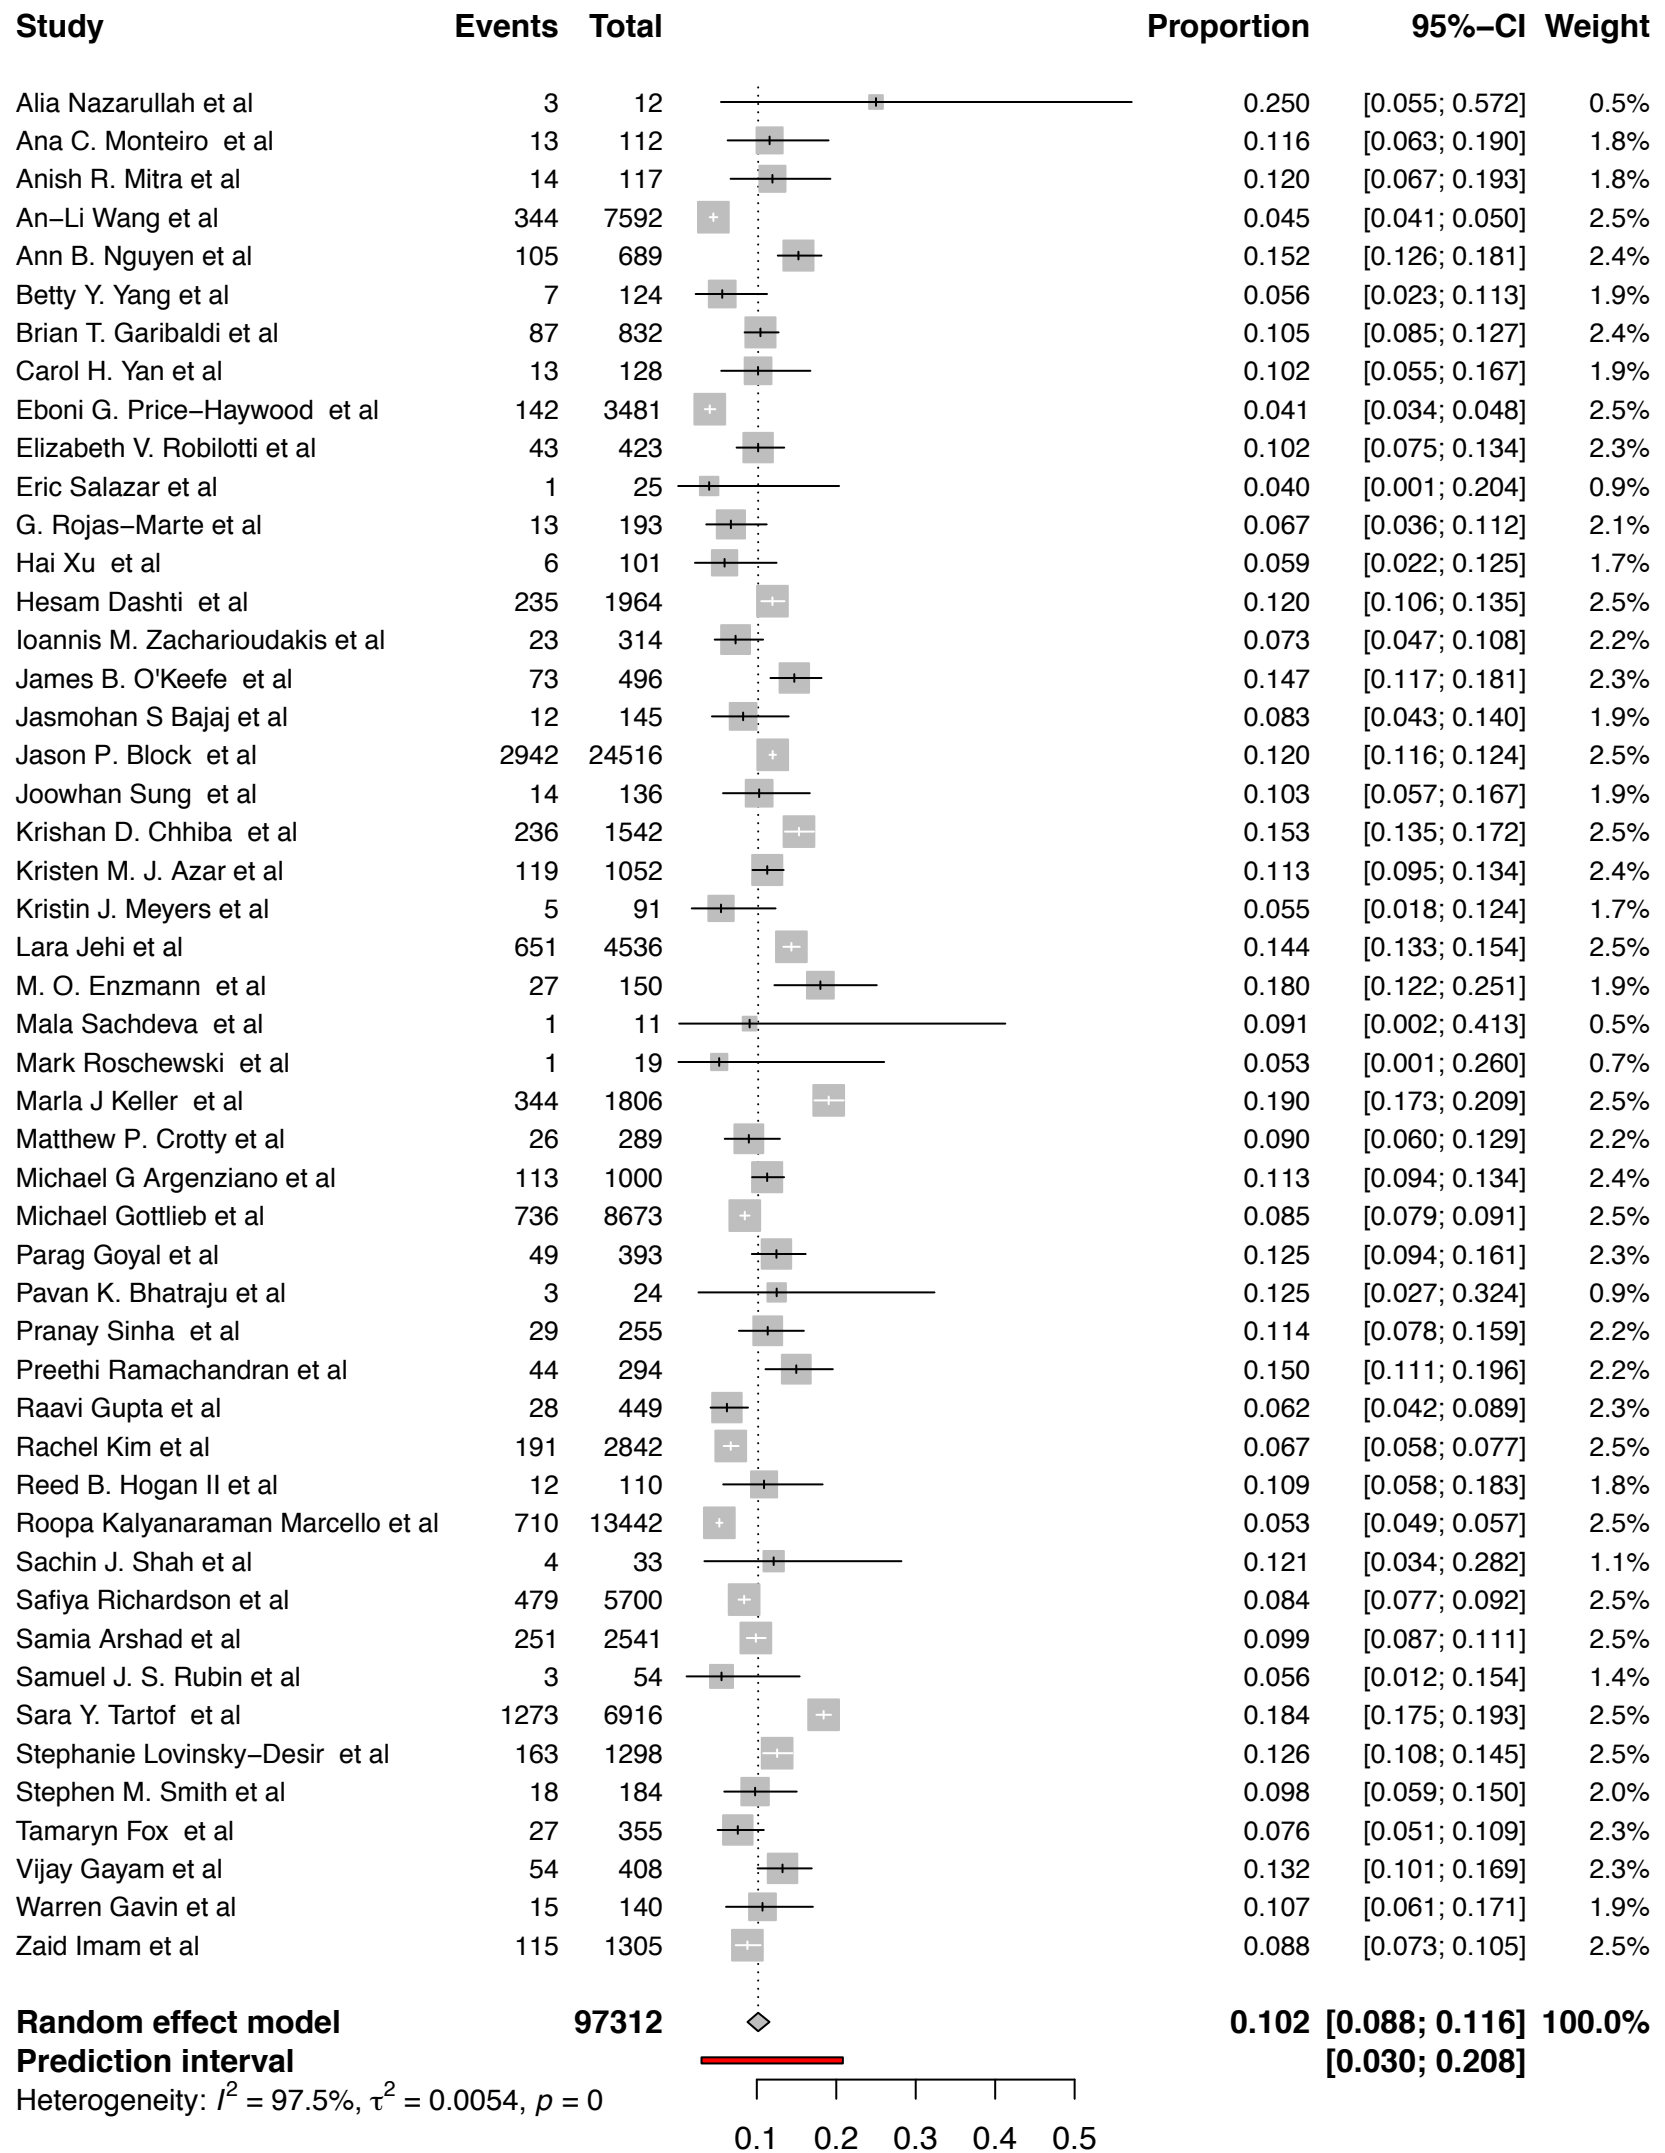

Supplement: mmc4.pdf [file mmc4.pdf]
